# Supplementary material for: Ingestion of High β-Glucan Barley Flour Enhances the Intestinal Immune System of Diet-Induced Obese Mice by Prebiotic Effects
Source: PubMed Central journal article supplement (PMC7999470; doi:10.3390/nu13030907), 2021-03-11
Supplement: nutrients-13-00907-s001.pdf [file nutrients-13-00907-s001.pdf]

**Table S1.** Composition of the control and HGB diets.

|                              | <b>(g/kg diet)</b> |            |
|------------------------------|--------------------|------------|
|                              | <b>Control</b>     | <b>HGB</b> |
| Casein                       | 200                | 157.4      |
| Corn starch                  | 197.5              | -          |
| $\alpha$ -Corn starch        | 132                | 27.3       |
| Sucrose                      | 100                | 100        |
| Soybean oil                  | 70                 | 70         |
| Lard                         | 200                | 192.4      |
| Cellulose                    | 50.0               | -          |
| Barley flour ("White Fiber") | -                  | 402.4      |
| AIN-93G mineral mixture      | 35                 | 35         |
| AIN-93 vitamin mixture       | 10                 | 10         |
| L-cystine                    | 3                  | 3          |
| Choline bitartrate           | 2.5                | 2.5        |
| <i>t</i> -butylhydroquinone  | 0.014              | 0.014      |

Barley flour ("White Fiber") from the Hakubaku Co. Ltd (Yamanashi, Japan), White fiber is contained  $\beta$ -glucan, 8.0%; total dietary fiber, 12.4%; protein, 8.4%; fat, 1.9%.  
HGB: High  $\beta$ -glucan barley group.

**Table S2.** List of standard bacterial strain and primer sequence for real time PCR.

| Phylum                             | Forward (Fw) / Reverse (Rv) | Primer sequence             | Standard bacteria strain. Strain No. |            | Reference                                                                |
|------------------------------------|-----------------------------|-----------------------------|--------------------------------------|------------|--------------------------------------------------------------------------|
| <i>Bacteroidetes</i>               | Fw                          | 5'-CRAACAGGATTAGATACCCT-3'  | <i>Bacteroides fragilis</i>          | JCM11019   | De Gregoris <i>et al</i> : J. Microbial Methods, Sep;86(3): 351-6, 2011. |
|                                    | Rv                          | 5'-GGTAAGGTTCTCGCGTAT-3'    |                                      |            |                                                                          |
| <i>Firmicutes</i>                  | Fw                          | 5'-TGAAACTYAAAGGAATTGACG-3' | <i>Ruminococcus albus</i>            | JCM14654   | De Gregoris <i>et al</i> : J. Microbial Methods, Sep;86(3): 351-6, 2011. |
|                                    | Rv                          | 5'-ACCATGCACCACCTGTC-3'     |                                      |            |                                                                          |
| <i>Actinobacteria</i>              | Fw                          | 5'-TACGGCCGCAAGGCTA-3'      | <i>Bifidobacterium longum</i>        | JCM1217    | De Gregoris <i>et al</i> : J. Microbial Methods, Sep;86(3): 351-6, 2011. |
|                                    | Rv                          | 5'-TCRTCCCCACCTTCTCCG-3'    |                                      |            |                                                                          |
| <i>Total bacteria</i>              | Fw                          | 5'-AAACTCAAAGKAATTGACGG     | <i>Ruminococcus albus</i>            | JCM14654   | De Gregoris <i>et al</i> : J. Microbial Methods, Sep;86(3): 351-6, 2011. |
|                                    | Rv                          | 5'-CTCACRRCACGAGCTGAC-3'    |                                      |            |                                                                          |
| Genus                              | Fw / Rv                     | Primer sequence             | Standard bacteria                    | Strain No. | Reference                                                                |
| <i>Bacteroides fragilis</i> group  | Fw                          | 5'-GTCAGTTGTGAAAGTTTGC-3'   | <i>Bacteroides fragilis</i>          | JCM11019   | Bernard AE <i>et al</i> : Appl Environ Microbiol, 66: 1587-94, 2000.     |
|                                    | Rv                          | 5'-CAATCGGAGTTCTTCGTG-3'    |                                      |            |                                                                          |
| <i>Lactobacillus</i>               | Fw                          | 5'-TGGAAACAGGTGCTAATAGGC-3' | <i>Lactobacillus ramosus</i>         | ATCC8530   | Roy Byun <i>et al</i> : J Clin Microbiol, 42(7): 3128-36, 2004.          |
|                                    | Rv                          | 5'-GTCCATTGTGGAAGATTCCC-3'  |                                      |            |                                                                          |
| <i>Bifidobacterium</i>             | Fw                          | 5'-AGGGTTCGATTCTGGCACAG-3'  | <i>Bifidobacterium longum</i>        | JCM1217    | Kok RG <i>et al</i> : Appl Environ Microbiol, 62: 3668-72, 1996.         |
|                                    | Rv                          | 5'-CATCCGGCATTACCACCC-3'    |                                      |            |                                                                          |
| <i>Prevotella</i>                  | Fw                          | 5'-CACCAAGGCGACGATGA-3'     | <i>Prevotella malaninogenica</i>     | JCM6325    | Larsen <i>et al</i> : PLoS ONE, 5: e9085, 2010.                          |
|                                    | Rv                          | 5'-GGATAACGCCTGGACCT-3'     |                                      |            |                                                                          |
| <i>Clostridium leptum</i> subgroup | Fw                          | 5'-GCACAAGCAGTGGAGT-3'      | <i>Ruminococcus albus</i>            | JCM14654   | Matsuki <i>et al</i> : Appl Environ Microbiol, 70: 7220-8, 2004.         |
|                                    | Rv                          | 5'-CTTCCTCCGTTTTGTCAA-3'    |                                      |            |                                                                          |
| <i>Clostridium coccoides</i> group | Fw                          | 5'-AAATGACGGTACCTGACTAA-3'  | <i>Clostridium coccoides</i>         | JCM1395T   | Matsuki <i>et al</i> : Appl Environ Microbiol, 70: 7220-8, 2004.         |

|                          |    |                              |                                |          |                                                                     |
|--------------------------|----|------------------------------|--------------------------------|----------|---------------------------------------------------------------------|
|                          | Rv | 5'-CTTTGAGTTTCATTCTTGCGAA-3' |                                |          |                                                                     |
| <i>Atopobium cluster</i> | Fw | 5'-GGTTGAGAGACCGACC-3'       | <i>Collinsella aerofaciens</i> | JCM10188 | Matsuki <i>et al</i> : Appl Environ Microbiol, 70:<br>7220-8, 2004. |
|                          | Rv | 5'-CGGRGCTTCTTCTGCAGG-3'     |                                |          |                                                                     |

---

R =A or G, K=T or G, Y=C or T.

**Table S3.** List of primers used for real-time PCR.

| gene symbol              | Forward                         | Reverse                       | reference                                                     |
|--------------------------|---------------------------------|-------------------------------|---------------------------------------------------------------|
| <i>IFN-γ</i>             | 5'-GCATCTTGGCTTTGCAGCT-3'       | 5'-CCTTTTTTCGCCTTGCTGTTG-3'   | Takiguchi, H <i>et al</i> : J Oral Sci, 54: 23-32, 2012.      |
| <i>IL-1β</i>             | 5'-CGCAGCAGCACATCAACAAGAGG-3'   | 5'-TGTCCTCATCCTGGAAGGTCCAC-3' | Aoe, S <i>et al</i> : Int J Hum Cult Stud, 26: 277-282, 2016. |
| <i>IL-4</i>              | 5'-CTTCCAAGGTGCTTCGCATA-3'      | 5'-AAGCCCGAAAGAGTCTCTGC-3'    | Yoon <i>et al</i> : BMC Complement Altern Med, 15: 353, 2015. |
| <i>IL-5</i>              | 5'-CCCCACGGACAGTTTGATT-3'       | 5'-TGAGGCTTCCTGTCCCTACT-3'    | Primer design was performed by NCBI Primer-Blast tool.        |
| <i>IL-6</i>              | 5'-CGGCCTTCCCTACTTCACAA-3'      | 5'-TCTGCAAGTGCATCATCGTT-3'    | Mio, K <i>et al</i> : nutrients, 12: 3546, 2020.              |
| <i>IL-10</i>             | 5'-TGGACAACATACTGCTAACC-3'      | 5'-GGATCATTTCCGATAAAGGCT-3'   | Paiva <i>et al</i> : BMC Microbiology, 13: 69, 2013.          |
| <i>IL-12</i>             | 5'-AGCACCAGCTTCTTCATCAGG-3'     | 5'-GCGCTGGATTGAAACAAAG-3'     | Paiva <i>et al</i> : BMC Microbiology, 13: 69, 2013.          |
| <i>IL-17</i>             | 5'-GCTCCAGAAGGCCCTCAGA-3'       | 5'-CTTTCCCTCCGCATTGACA-3'     | Paiva <i>et al</i> : BMC Microbiology, 13: 69, 2013.          |
| <i>IL-33</i>             | 5'-GGGCTCACTGCAGGAAAGTA-3'      | 5'-TTTGCCGGGAAATCTTGGA-3'     | Primer design was performed by NCBI Primer-Blast tool.        |
| <i>TNF-α</i>             | 5'-ACCCTCACACACTCAGATCATCTTC-3' | 5'-TGGTGGTTTGCTACGACGT-3'     | Aoe, S <i>et al</i> : Int J Hum Cult Stud, 26: 277-282, 2016. |
| <i>TGFβ</i>              | 5'-AGGGCTACCATGCCAACTTC-3'      | 5'-CCACGTAGTAGACGATGGGC-3'    | Lai D <i>et al</i> : PLoS One, 9(5): e98749, 2014.            |
| <i>pIgR</i>              | 5'-TTGTTACGCTCTTGTAAGT-3'       | 5'-ACAGGCCTCGGTTACTGGTACC-3'  | Blanch, VJ <i>et al</i> : J Immunol, 62: 1232-5, 1999.        |
| Reference<br><i>36B4</i> | 5'-GGCCCTGCACTCTCGCTTTC-3'      | 5'-TGCCAGGACGCGCTTGT-3'       | Aoe, S <i>et al</i> : nutrients, 11: 1674, 2019.              |

R =A or G. IFN-γ, interferon gamma; IL-10, interleukin 10; IL-12, interleukin 12; IL-17, interleukin 17; IL-1β, interleukin 1 beta; IL-33, interleukin 33; IL-4, interleukin 4; IL-5, interleukin 5; IL-6, interleukin 6; pIgR, polymeric immunoglobulin receptor; TGFβ, transforming growth factor beta; TNF-α, tumor necrosis factor-α.

**Table S4.** KEGG enrichment analysis with upregulated DEGs in the ileum of barley group by using DAVID database.

| ID       | Pathway name                           | Count | P value | FDR    |
|----------|----------------------------------------|-------|---------|--------|
| mmu00591 | Linoleic acid metabolism               | 12    | 8.3e-6  | 2.0e-3 |
| mmu00590 | Arachidonic acid metabolism            | 15    | 3.0e-5  | 3.6e-3 |
| mmu04640 | Hematopoietic cell lineage             | 14    | 7.8e-5  | 6.2e-3 |
| mmu00830 | Retinol metabolism                     | 14    | 1.3e-4  | 7.4e-3 |
| mmu04060 | Cytokine-cytokine receptor interaction | 25    | 1.5e-4  | 7.4e-3 |
| mmu05150 | Staphylococcus aureus infection        | 10    | 2.9e-4  | 1.1e-2 |
| mmu05340 | Primary immunodeficiency               | 8     | 5.8e-4  | 2.0e-2 |
| mmu05204 | Chemical carcinogenesis                | 13    | 6.7e-4  | 2.0e-2 |
| mmu04514 | Cell adhesion molecules (CAMs)         | 18    | 7.5e-4  | 2.0e-2 |
| mmu04662 | B cell receptor signaling pathway      | 11    | 9.1e-4  | 2.2e-2 |
| mmu00140 | Steroid hormone biosynthesis           | 12    | 1.4e-3  | 3.1e-2 |
| mmu04610 | Complement and coagulation cascades    | 11    | 1.7e-3  | 3.4e-2 |

FDR were adjusted by using Benjamini-Hochberg algorithm.

**Table S5.** Final weight, body weight gain, food intake, and organ weight in mice fed the control and HGB diets.

|                           | <b>Control</b> | <b>HGB</b>   |
|---------------------------|----------------|--------------|
| Initial weight (g)        | 20.0 ± 0.3     | 20.0 ± 0.4   |
| Final weight (g)          | 42.4 ± 1.5     | 38.4 ± 1.2*  |
| Body weight gain (g/day)  | 0.25 ± 0.02    | 0.20 ± 0.01* |
| Food intake (g/day)       | 2.85 ± 0.06    | 2.82 ± 0.04  |
| Food efficiency ratio (%) | 8.7 ± 0.4      | 7.2 ± 0.3*   |
| Liver (g)                 | 1.5 ± 0.1      | 1.2 ± 0.1*   |
| Cecum with digesta (g)    | 0.2 ± 0.02     | 0.4 ± 0.03*  |
| Epididymal fat (g)        | 2.3 ± 0.1      | 2.2 ± 0.2    |
| Retroperitoneal fat (g)   | 1.0 ± 0.1      | 0.7 ± 0.1*   |
| Mesenteric fat (g)        | 1.1 ± 0.2      | 0.6 ± 0.1*   |

Values are mean ± SE (n=8). \*  $p < 0.05$  showed significantly different among each group. Food efficiency ratio (%) = Body weight gain/Food intake × 100. HGB: High  $\beta$ -glucan barley group.

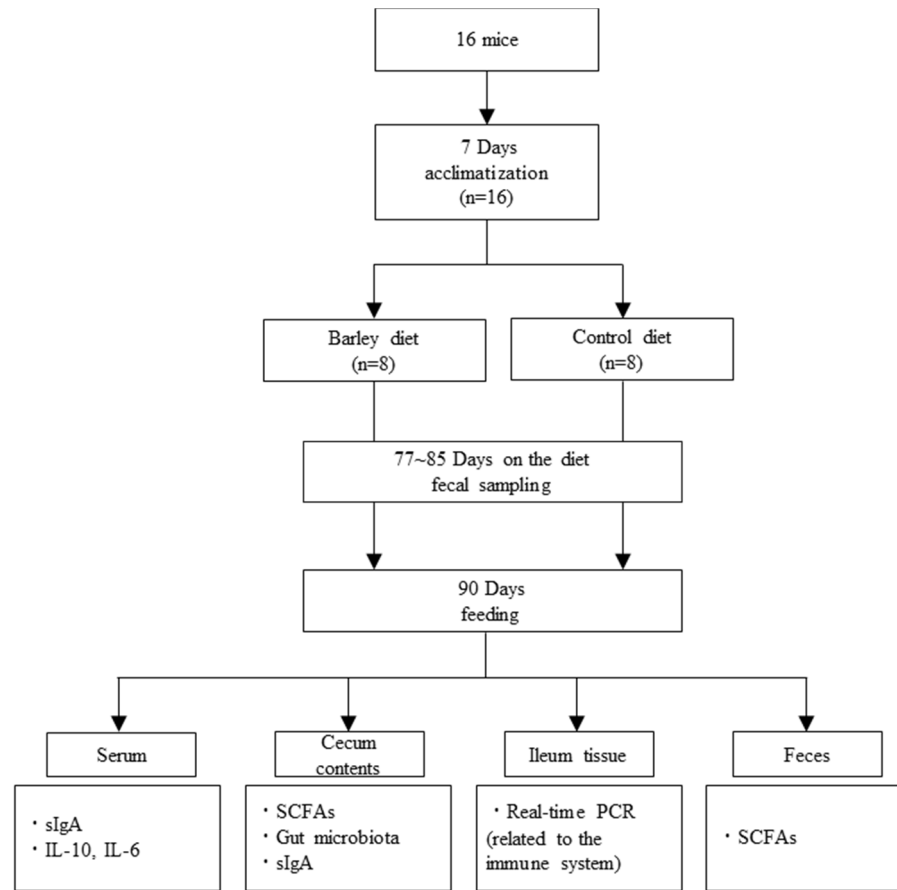

**Figure S1.** Flow chart showing the study design of the animal studies. sIgA, secretory immunoglobulin A; SCFAs, Short-chain fatty acids.

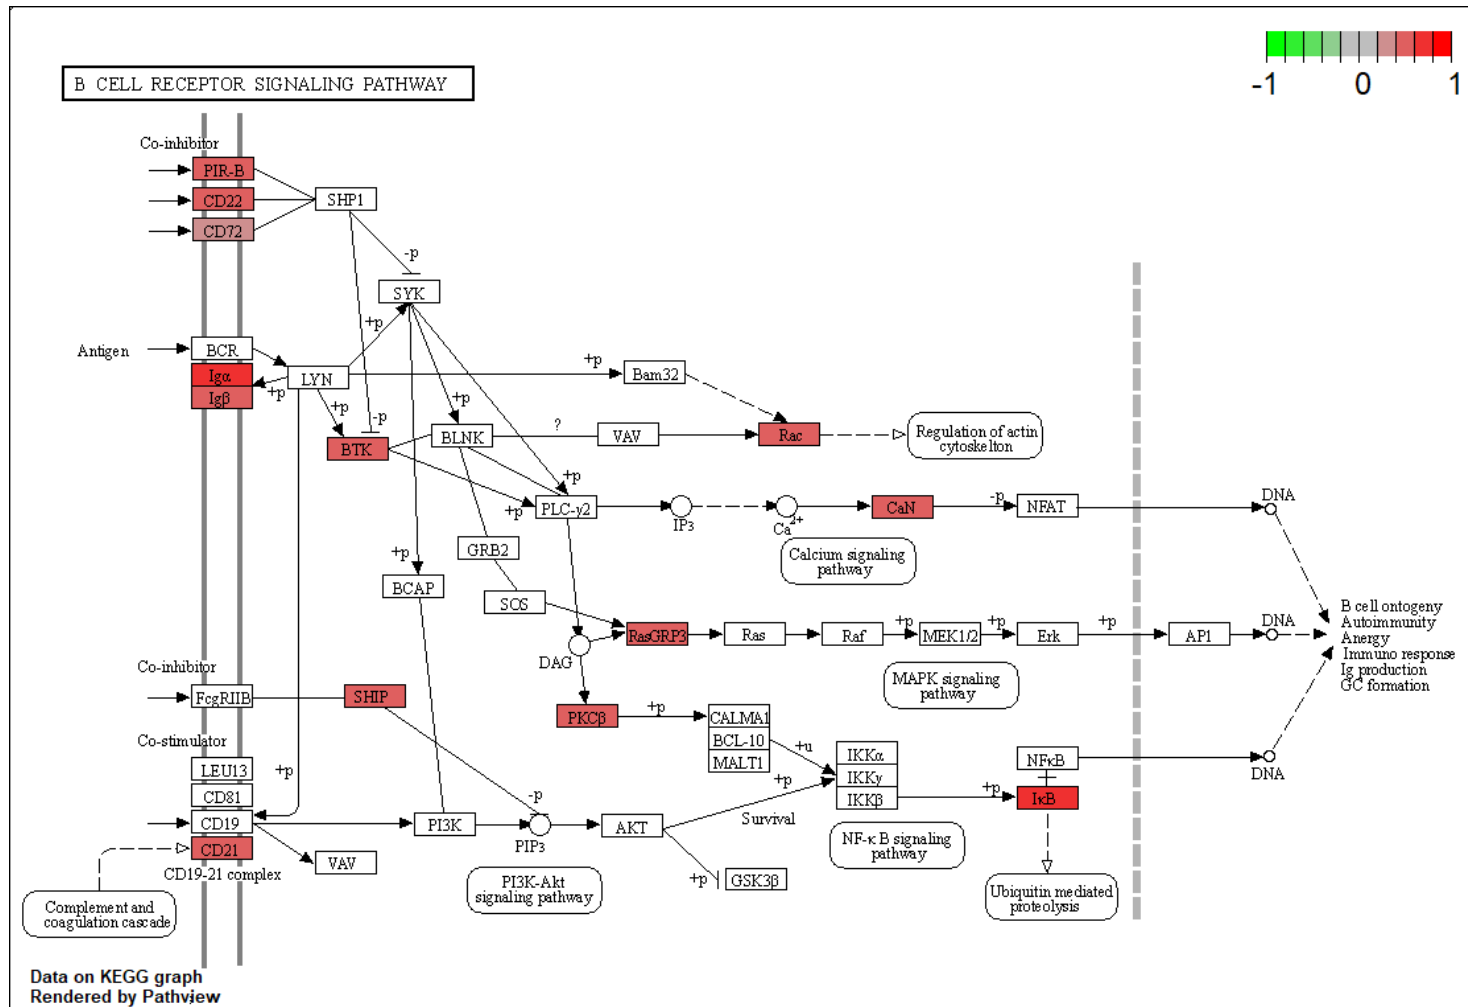

**Figure S2.** DEGs up-regulated by barley group involved in B cell receptor signaling pathway (extracted from Kyoto Encyclopedia of Genes and Genomes pathway). DEGs: Differential expressed genes had selected the cut-off criteria (Log-ratio > 1.3 fold in the barley group compared with the control group). The color depth in the figure indicates the Log-ratio values.



(a)

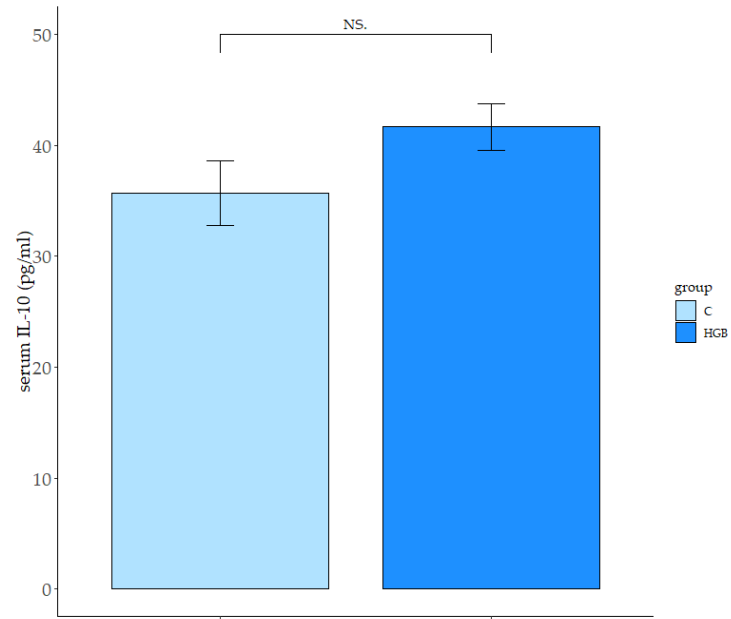

(b)

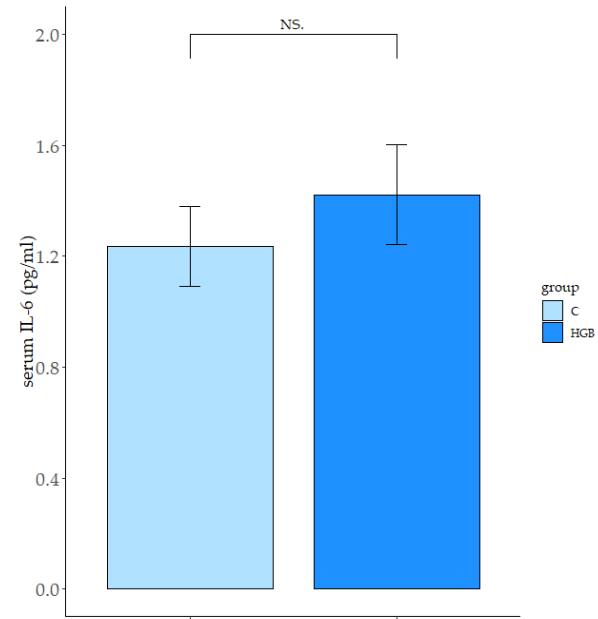

**Figure S3.** The concentration of IL-10 (a) and IL-6 (b) in serum. Values are means  $\pm$  SE, n=8. C: control group, HGB: high  $\beta$ -glucan barley group. "NS" is not significant difference between each group.

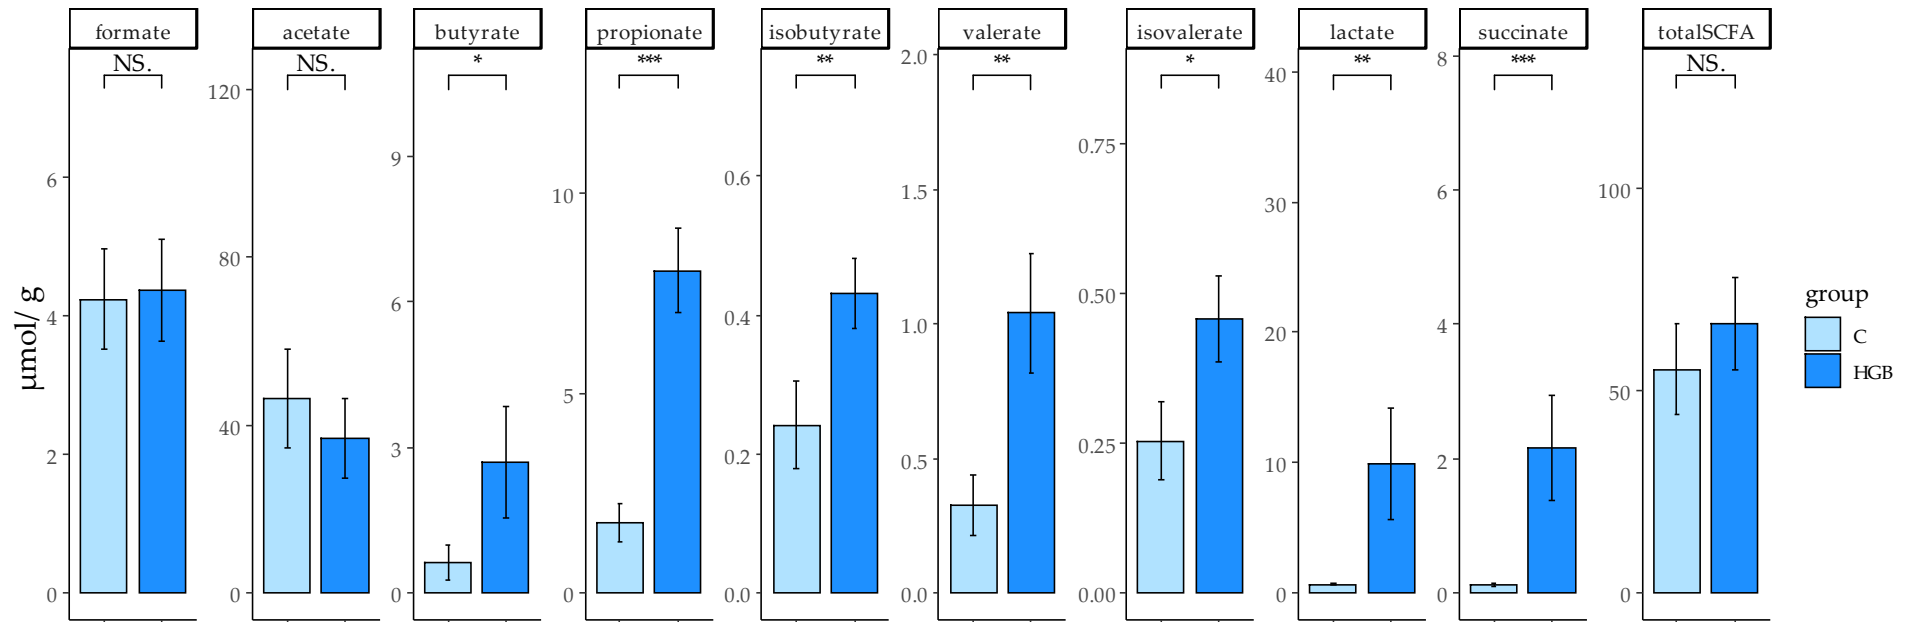

**Figure S4.** The concentration of SCFAs and organic acids in feces. Values are means  $\pm$  SE, n=8. \*  $p < 0.05$ , \*\*  $p < 0.01$ , \*\*\*  $p < 0.001$  showed a significant difference between each group, "NS" is not significant. C: control group, HGB: high  $\beta$ -glucan barley group. C: control group, HGB: high  $\beta$ -glucan barley group.
